# Supplementary material
Source: PubMed Central journal article supplement (PMC2409222)

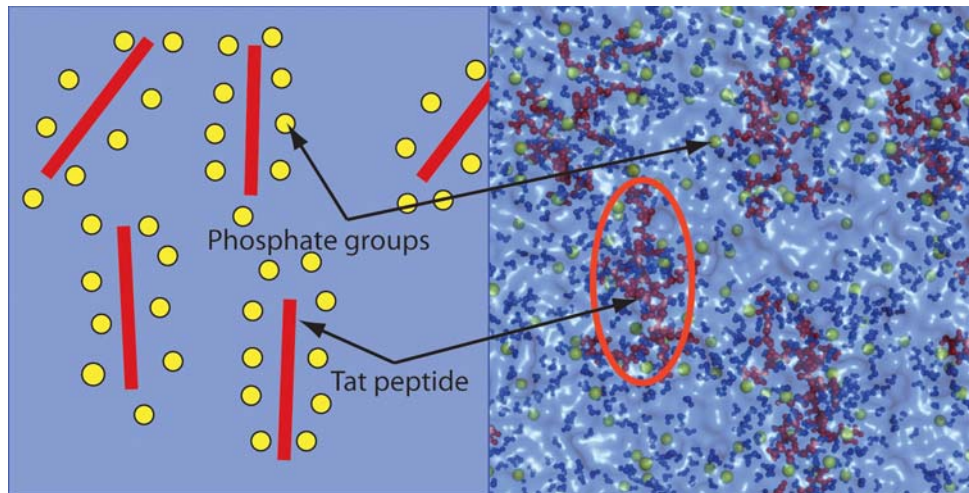

Supplement: pnas_0706574105_1.pdf [file pnas_0706574105_1.pdf]

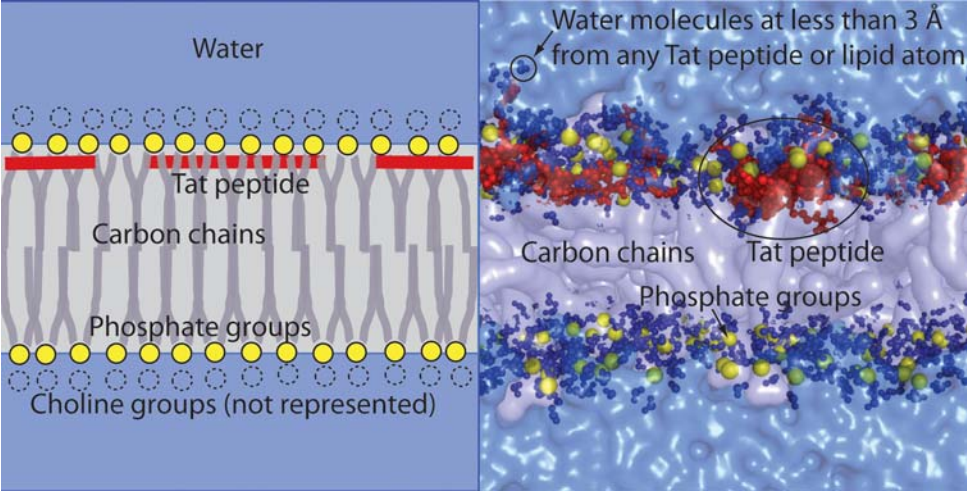

Supplement: pnas_0706574105_2.pdf [file pnas_0706574105_2.pdf]

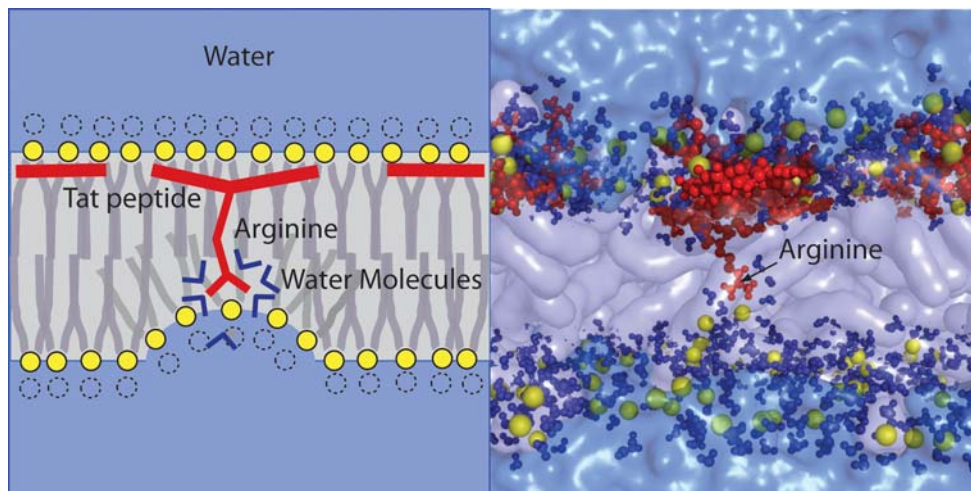

Supplement: pnas_0706574105_3.pdf [file pnas_0706574105_3.pdf]

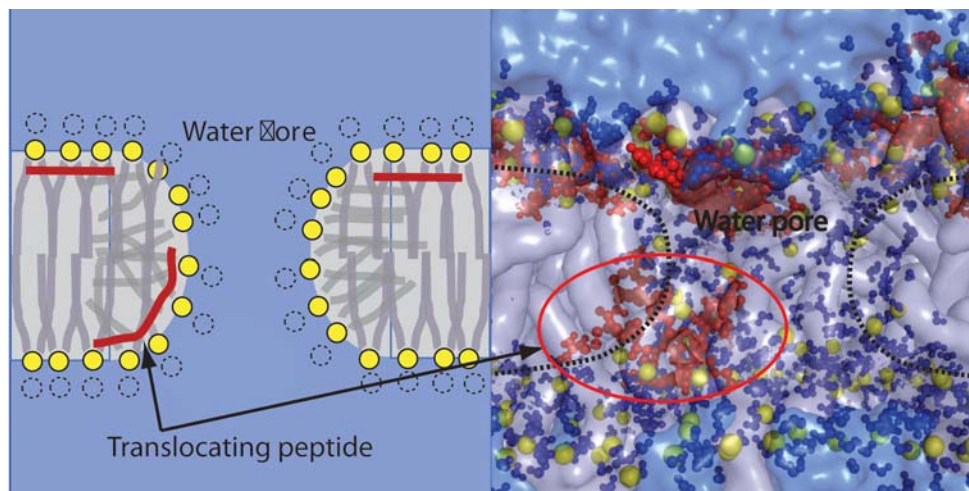

Supplement: pnas_0706574105_4.pdf [file pnas_0706574105_4.pdf]

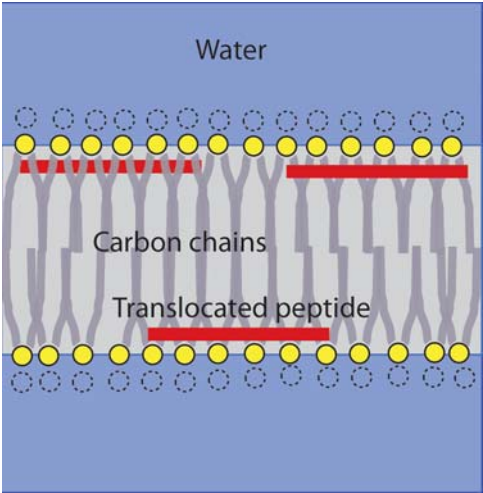

Supplement: pnas_0706574105_5.pdf [file pnas_0706574105_5.pdf]
